1 **TITLE:**

2 Evaluating the clinical validity of gene-disease associations: an evidence-based  
3 framework developed by the Clinical Genome Resource

4  
5 **AUTHORS:**

6 Natasha T. Strande<sup>1,2</sup>, Erin Rooney Riggs<sup>1,3</sup>, Adam H. Buchanan<sup>4</sup>, Ozge Ceyhan-  
7 Birsoy<sup>7-10</sup>, Marina DiStefano<sup>7</sup>, Selina S. Dwight<sup>5</sup>, Jenny Goldstein<sup>2</sup>, Rajarshi Ghosh<sup>6</sup>,  
8 Bryce A. Seifert<sup>2</sup>, Tam P. Sneddon<sup>5</sup>, Matt W. Wright<sup>5</sup>, Laura V. Milko<sup>2</sup>, J. Michael  
9 Cherry<sup>5</sup>, Monica A. Giovanni<sup>4</sup>, Michael F. Murray<sup>4</sup>, Julianne M. O'Daniel<sup>2</sup>, Erin M.  
10 Ramos<sup>11</sup>, Avni B. Santani<sup>12,13</sup>, Alan F. Scott<sup>14</sup>, Sharon E. Plon<sup>6</sup>, Heidi L. Rehm<sup>7-10</sup>,  
11 Christa L. Martin<sup>\*3,4</sup>, Jonathan S. Berg<sup>\*2</sup>

12  
13 **AFFILIATIONS:**

14 <sup>1</sup> These authors contributed equally to this work

15 <sup>2</sup> Department of Genetics, School of Medicine, University of North Carolina at Chapel  
16 Hill, Chapel Hill, North Carolina, USA.

17 <sup>3</sup> Autism & Developmental Medicine Institute, Geisinger Health System, Danville,  
18 Pennsylvania, USA.

19 <sup>4</sup> Genomic Medicine Institute, Geisinger Health System, Danville, Pennsylvania, USA.

20 <sup>5</sup> Department of Genetics, Stanford University, Stanford, California 94305, USA.

21 <sup>6</sup> Department of Pediatrics, Baylor College of Medicine, Houston, Texas, USA.

22 <sup>7</sup> Laboratory for Molecular Medicine, Partners Personalized Medicine, Boston,  
23 Massachusetts, USA.

1 <sup>8</sup> The Broad Institute of Harvard and MIT, Cambridge, Massachusetts, USA.

2 <sup>9</sup> Harvard Medical School, Boston, Massachusetts, USA.

3 <sup>10</sup> Department of Pathology, Brigham & Women's Hospital, Boston, Massachusetts.

4 <sup>11</sup> National Human Genome Research Institute, National Institutes of Health, Bethesda,  
5 Maryland, USA.

6 <sup>12</sup> Department of Pathology and Laboratory Medicine, Perelman School of Medicine,  
7 University of Pennsylvania, Philadelphia, Pennsylvania 19104, USA.

8 <sup>13</sup> Division of Genomic Diagnostics, Children's Hospital of Philadelphia, Philadelphia,  
9 Pennsylvania 19104, USA.

10 <sup>14</sup> McKusick-Nathans Institute of Genetic Medicine, Johns Hopkins University School of  
11 Medicine, Baltimore, MD 21287, USA.

12

13 ***CORRESPONDING AUTHORS\****: Jonathan S. Berg ([jonathan\\_berg@med.unc.edu](mailto:jonathan_berg@med.unc.edu)) and

14 Christa L. Martin ([clmartin1@geisinger.edu](mailto:clmartin1@geisinger.edu))

1 **ABSTRACT**

2 With advances in genomic sequencing technology, the number of reported gene-  
3 disease relationships has rapidly expanded. However, the evidence supporting these  
4 claims varies widely, confounding accurate evaluation of genomic variation in a clinical  
5 setting. Despite the critical need to differentiate clinically valid relationships from less  
6 well-substantiated relationships, standard guidelines for such evaluation do not currently  
7 exist. The NIH-funded Clinical Genome Resource (ClinGen) has developed a  
8 framework to define and evaluate the clinical validity of gene-disease pairs across a  
9 variety of Mendelian disorders. In this manuscript we describe a proposed framework to  
10 evaluate relevant genetic and experimental evidence supporting or contradicting a  
11 gene-disease relationship, and the subsequent validation of this framework using a set  
12 of representative gene-disease pairs. The framework provides a semi-quantitative  
13 measurement for the strength of evidence of a gene-disease relationship which  
14 correlates to a qualitative classification: “Definitive”, “Strong”, “Moderate”, “Limited”, “No  
15 Reported Evidence” or “Conflicting Evidence.” Within the ClinGen structure,  
16 classifications derived using this framework are reviewed and confirmed or adjusted  
17 based on clinical expertise of appropriate disease experts. Detailed guidance for  
18 utilizing this framework and access to the curation interface is available on our website.  
19 This evidence-based, systematic method to assess the strength of gene-disease  
20 relationships will facilitate more knowledgeable utilization of genomic variants in clinical  
21 and research settings.

22

## 1 **INTRODUCTION**

2  
3 The human genome comprises approximately 20,000 protein-coding genes<sup>1</sup>, of which  
4 about 3,000 have been reported in association with at least one Mendelian disease<sup>2</sup>.  
5 Roughly half<sup>2</sup> of these gene-disease relationships have been identified over the last  
6 decade, as technological advances have made it possible to use sequence information  
7 from small families or even single individuals to discover new candidate gene-disease  
8 relationships<sup>3,4</sup>. However, there is substantial variability in the level of evidence  
9 supporting these claims, and a systematic method for curating and assessing evidence  
10 is needed.

11 Despite this variability, clinical laboratories may include genes with preliminary evidence  
12 of a gene-disease relationship on disease-targeted panels, or in results returned from  
13 exome/genome sequencing. Some of the gene-disease relationships are either unable  
14 to be confirmed for many years or are ultimately proven wrong<sup>5</sup>. Evaluating the clinical  
15 impact of variants identified in genes with an unclear role in disease is exceedingly  
16 difficult, and could lead to incorrect diagnoses, preventing further evaluations and/or  
17 resulting in errant management of the affected individual and their families. This  
18 scenario highlights the need for a standardized method to evaluate the evidence  
19 implicating a gene in disease and thereby determine the clinical validity<sup>3</sup> of a gene-  
20 disease relationship.

21 The NIH-funded Clinical Genome Resource (ClinGen)<sup>6</sup> is creating an open-access  
22 resource to better define clinically relevant genes and variants based on standardized,  
23 transparent evidence assessment for use in precision medicine and research. Our

1 group has developed a method that 1) qualitatively defines gene-disease clinical validity  
2 using a classification scheme based on the strength of evidence supporting the  
3 relationship, and 2) provides a standardized semi-quantitative approach to evaluate  
4 available evidence and arrive at such a classification. Currently, this framework is  
5 optimized for genes associated with monogenic disorders following autosomal  
6 dominant, autosomal recessive, or X-linked inheritance. Future iterations will expand the  
7 framework to consider other modes of inheritance, such as mitochondrial, and diseases  
8 with more complex genomic etiologies, including oligogenic or multifactorial conditions.  
9 Our approach is neither intended to define multifactorial disease risk, nor to be a  
10 substitute for well-established statistical thresholds used for genome-wide association  
11 studies<sup>7; 8</sup>.

12 This novel framework classifies gene-disease relationships by the quantity and quality  
13 of the evidence supporting such a relationship. It builds on efforts to catalog gene-  
14 disease associations, such as the Online Mendelian Inheritance in Man (OMIM)<sup>1</sup> and  
15 OrphaNet, by systematically organizing the supporting and refuting evidence, and  
16 categorizing the strength of evidence supporting these relationships. The resulting  
17 clinical validity classifications are valuable to both clinicians and clinical laboratories.  
18 First, they provide insight into the strength of clinical associations for clinicians  
19 interpreting genetic test results for clinical care. Second, they serve to guide clinical  
20 genetic testing laboratories as they develop disease-specific clinical genetic testing  
21 panels or interpret genome-scale sequencing tests. By including only those genes with  
22 established clinical validity, the possibility of returning ambiguous, incorrect, or  
23 uninformative results is reduced, improving the quality of interpretation of genomic data.

## 1 **QUALITATIVE DESCRIPTION: CLINICAL VALIDITY CLASSIFICATIONS**

2 The ClinGen Gene Curation Working Group (GCWG) is comprised of medical  
3 geneticists, clinical laboratory diagnosticians, genetic counselors, and biocurators with  
4 broad experience in both clinical and laboratory genetics. Over the course of three  
5 years, this group convened bi-monthly to develop the described framework for  
6 assessing gene-disease clinical validity through expert opinion and working group  
7 consensus (additional details provided on the ClinGen website). We first defined six  
8 classes to qualitatively describe the strength of evidence supporting a gene-disease  
9 association (Figure 1). The amount and type of evidence required for each clinical  
10 validity classification builds upon that of the previous classification level. Evidence used  
11 within this framework to assign a classification to a gene-disease pair is divided into two  
12 main types: genetic evidence and experimental evidence (described below). As  
13 evidence is likely to change over time, any given classification is only representative of  
14 the level of evidence at the time of curation.

15 The classification “No Reported Evidence” is used for genes that have not yet been  
16 asserted to have a causal relationship with a human monogenic disorder, but may have  
17 some experimental data (e.g., model system data) suggesting a potential role for that  
18 gene in disease. The “Limited” classification requires at least one variant, asserted to be  
19 disease-causing, to have plausible genetic evidence to support the association with  
20 human disease with or without gene-level experimental data. “Moderate” classification  
21 encompasses additional clinical evidence (e.g. multiple unrelated probands harboring  
22 variants with potential roles in disease) and supporting experimental evidence, all of  
23 which may be provided by multiple studies or a single robust study. Replication of the

1 gene-disease association in subsequent independent publications and additional  
2 substantial genetic and experimental data are critical factors for the “Strong”  
3 classification. Finally, the hallmark of a “Definitive” gene-disease association is that, in  
4 addition to the accumulation of convincing genetic and experimental evidence, the  
5 relationship has been replicated, and ample time has passed since the initial publication  
6 (in general, greater than three years) for any conflicting evidence to emerge. It is  
7 important to highlight that these classifications do not reflect the effect size or relative  
8 risk attributable to variants in a particular gene, but instead the strength of the evidence.  
9 For example, a definitive gene-disease association does not imply that a pathogenic  
10 variant in that gene confers 100% penetrance of the phenotype. This metric is not  
11 intended to assess the penetrance or risk to develop a disease outcome.

12 A gene-disease relationship can be determined to have one of the above classifications  
13 provided no substantial relevant and valid contradictory evidence exists to call the gene-  
14 disease relationship into question. If such evidence emerges, then the relationship is  
15 described as “Conflicting Evidence Reported.” Types of contradictory evidence may  
16 come from population studies (such as ExAC<sup>9</sup>), attempts to experimentally validate the  
17 gene-disease association, or re-analysis of the original family or cohort that was  
18 previously studied. Although the role of a specific *variant* in a given disease may be  
19 called into question by new evidence, this may not be sufficient to invalidate the role of  
20 the *gene* in that disease. Thorough evaluation by experts in the particular disease area  
21 is recommended to determine whether the contradictory evidence outweighs the  
22 existing supportive evidence to classify a gene into either a “Disputed” or “Refuted”  
23 category (see Figure 1 for additional details).

## 1 **METHODS: SEMI-QUANTITATIVE ASSESSMENT OF EVIDENCE**

2 Assigning a clinical validity classification to a gene-disease pair requires assessment of  
3 the evidence supporting the association. We developed a semi-quantitative approach to  
4 evaluate both genetic (Figure 2) and experimental evidence (Figure 3) in a standardized  
5 manner that promotes consistent collection and weighting of evidence (a detailed  
6 standard operating procedure is available on the ClinGen website). Defined sub-  
7 categories of genetic and experimental evidence are given a suggested default “score.”  
8 However, given that evidence of the same general type may vary in its strength  
9 (particularly when considering different diseases), the scoring system also allows these  
10 scores to be adjusted within a set range of points, with final approval by experts within  
11 the particular disease domain. Finally, the maximum number of points allowed for the  
12 various types of genetic and experimental evidence is capped to prevent a  
13 preponderance of weak evidence from inappropriately inflating the gene-disease  
14 classification. Similarly, certain evidence categories are provided higher maximum  
15 scores, allowing key pieces of stronger evidence to proportionately influence the  
16 classification of a gene-disease pair.

### 17 **Genetic Evidence**

18 For the purposes of scoring, genetic evidence is divided into two categories: case-level  
19 data and case-control data (Figure 2). Studies describing individuals or families with  
20 genetic variants are scored as case-level data, while studies using statistical analyses  
21 to compare variants in cases and controls are scored as case-control data. When case-  
22 level and case-control data are present in a single publication, points can be assigned in



1 each category, but the same piece of evidence should not be counted more than once.  
2 For example, an individual case that is also included within a case-control cohort should  
3 not be given points in both the “case-level data” and “case-control data” categories. In  
4 this scenario, points should be assigned to the most compelling and informative  
5 evidence.

6 Assessing case-level data requires consideration of the inheritance pattern and  
7 evaluation of the individual variants identified in each case. Within this framework, a  
8 case should only be counted towards supporting evidence if the reported variant has  
9 some indication of a potential role in disease (e.g., impact on gene function, recurrence  
10 in affected individuals, etc.), does not have evidence that would contradict pathogenicity  
11 (e.g., population allele frequency), and is of the type consistent with the assumed  
12 disease mechanism (e.g. truncating variant for loss of function). Unless otherwise  
13 noted, the term “qualifying variant” implies that these criteria are met. In addition, points  
14 are assigned separately for segregation data to reflect the statistical probability that the  
15 locus is implicated in the disease. Figure 2 and Figure S1 provide guidance on the  
16 number of points that should be considered for segregation evidence by LOD score; if a  
17 LOD score is not provided within the publication being evaluated, an estimated LOD  
18 score may be calculated in certain scenarios, as described in the standard operating  
19 procedure document provided on the ClinGen website.

20 Each study categorized as “case-control data” should be independently assessed to  
21 evaluate the quality of the study design (see Figure 2). Consultation with a clinical  
22 domain expert group (such as those affiliated with ClinGen,  
23 <https://www.clinicalgenome.org/working-groups/clinical-domain/>) is recommended. For

1 the purposes of this framework, studies are classified based on whether they include  
2 single variant analysis or aggregate variant analysis. Single variant analyses are those  
3 in which individual variants are evaluated for statistical enrichment in cases compared  
4 to controls. More than one variant may be analyzed, but the variants have been  
5 independently assessed with appropriate statistical correction for multiple testing.  
6 Aggregate variant analyses are those in which the total number of variants is assessed  
7 for enrichment in cases compared with controls. This comparison is typically  
8 accomplished by sequencing the entire gene in both cases and controls and  
9 demonstrating an increased “burden” of variants of one or more types.

## 10 **Experimental Evidence**

11 The experimental data scoring system is presented in Figure 3. The gene-level  
12 experimental data used in this framework to assess a gene-disease association are  
13 consistent with those proposed by MacArthur and colleagues to implicate a gene in  
14 disease<sup>10</sup>. The following experimental evidence types are used: biochemical function,  
15 experimental protein interactions, expression, functional alteration, phenotypic rescue  
16 and model systems (Figure 3 bottom panel). These categories capture the most  
17 relevant types of experimental information necessary to determine whether the function  
18 of the gene product is at least consistent with the disease with which it is associated, if  
19 not causally implicated.

## 20 **Contradictory Evidence**

21 While curators are encouraged to seek out and document (via qualitative description)  
22 conflicting evidence, no specific points are assigned to this category. The types of valid

1 contradictory evidence and their relative weights will be unique to each gene-disease  
2 pair, and it would be misleading to attempt to uniformly quantify this type of negative  
3 evidence against the reported positive evidence. If there is substantial conflicting  
4 evidence, manual review and expert input is required to evaluate the strength of the  
5 contradictory evidence, determine whether it outweighs any available supporting  
6 evidence, and, if so, decide whether the gene-disease association should be classified  
7 as “Disputed” or “Refuted”.

## 8 **Summary & Final Matrix**

9 The scores assigned to both genetic and experimental evidence are tallied to generate  
10 a total score (ranging from 1-18) that corresponds to a preliminary clinical validity  
11 classification (Figure 4). The system provides a transparent method for summarizing  
12 and assessing all curated evidence for a gene-disease pair, encouraging consistency  
13 between curators. While the summary matrix facilitates a preliminary assessment of the  
14 gene-disease relationship, the initial curator or expert reviewer may adjust the  
15 classification, supplying a specific rationale for the change. Final classifications are  
16 determined in collaboration with disease experts, who review the preliminary  
17 classification and supporting evidence and work to come to a consensus with the  
18 preliminary curators. In the event that the disease experts and preliminary curators  
19 disagree on a final classification, a senior member of the ClinGen Gene Curation  
20 Working Group may be brought in to facilitate a final classification, erring towards the  
21 more conservative classification if consensus cannot be achieved. It should be noted  
22 that experimental data alone cannot justify a clinical validity classification beyond “No  
23 Reported Evidence,” and at least one human genetic variant with a plausible causal

1 association must be present to attain “Limited” classification. The difference between  
2 “Limited,” “Moderate,” and “Strong” gene-disease classifications is justified by the  
3 quality and quantity of evidence; it is expected that valid gene-disease associations will  
4 gradually accumulate enough supporting evidence and be replicated over time to attain  
5 a “definitive” classification. This framework relies predominantly on evidence obtained  
6 from published primary literature, identified through resources such as PubMed and  
7 OMIM<sup>1</sup>, and independently assessed by curators; however, if necessary, unpublished  
8 information available from publicly accessible resources, such as variant databases<sup>11; 12</sup>,  
9 may be used as long as some supporting evidence is provided.

10

## 11 ***RESULTS: VALIDATION OF METHOD***

12 Using this framework we evaluated 33 gene-disease pairs representing a variety of  
13 disease domains and spanning the spectrum of clinical validity classifications (see  
14 Table 1, Figure 5, and Supplemental Appendix). To assess the reproducibility of our  
15 scoring metric, each gene-disease pair was evaluated by two independent curators;  
16 paired curators reached concordant clinical validity classifications in 29 of the 31  
17 (93.5%) gene-disease pairs with available published evidence (Figure 5; associations  
18 classified as “No Reported Evidence” were excluded). Each gene-disease pair was  
19 subsequently reviewed by clinical domain experts; experts agreed with the preliminary  
20 classifications for 87.1% (27/31) of the gene-disease pairs with published evidence  
21 (Figure 5). The four discrepancies between the expert and curator classifications were  
22 each different by only a single category (e.g. limited versus moderate). Of note, the  
23 original classifications for *HNRNPK* (MIM 600712) and *SMARCA1* (MIM 300012) were

1 at the border between limited and moderate (6.5 points); in each case, the preliminary  
2 curators' lack of specific clinical expertise led to uncertainty regarding the scoring of  
3 evidence requiring such knowledge. Consulting with clinical experts in the disease  
4 resolved these issues resulting in both genes being upgraded to moderate. In the case  
5 of *WRAP53* (MIM 612661), the expert was aware of additional published experimental  
6 evidence that when included increased the classification from limited to moderate. Upon  
7 reviewing the curated evidence for *RAD51D* (MIM 602954) and breast cancer (MIM  
8 614291), the domain expert upgraded the classification from disputed to limited (with  
9 the approval of the GCWG) due to the specificity of the experimental evidence and  
10 insufficient power of the current studies to rule out a role for *RAD51D* in breast cancer  
11 (Figure 5). Details and references for each curation are provided in Supplemental  
12 Appendix.

## 13 14 **DISCUSSION**

15 The evidence-based framework described here qualitatively defines clinical validity  
16 classifications for gene-disease associations in monogenic conditions and provides a  
17 systematic framework for evaluating key criteria required for these classifications. This  
18 method is intentionally flexible to accommodate curation of a wide spectrum of genes  
19 and conditions by curators with varying levels of expertise. The semi-quantitative  
20 scoring system combined with the qualitative classification scheme guides curators  
21 through the preliminary decision-making process, while the expert-level review provides  
22 disease-specific experience to weigh in on the final classification.

1 This effort to create a generalized framework may result in some specific challenges  
2 due to the heterogeneity of genetic conditions, in both phenotype and prevalence. For  
3 example, conditions that span a large phenotypic spectrum may pose a challenge when  
4 defining what constitutes a condition and what is most relevant for curation purposes. In  
5 general, ClinGen encourages its expert curation groups to focus on disease  
6 associations that have been asserted in the literature or in other authoritative sources  
7 (e.g. OMIM, Orphanet Disease Ontology). Expert reviewers may find it useful in certain  
8 scenarios, to curate both a syndromic disease association as well as an isolated/non-  
9 syndromic disease association limited to a particular sub-phenotype. For example,  
10 when a disease entity encompasses sub-phenotypes that are caused by different  
11 mutational mechanisms. This is a topic of continued discourse within the ClinGen  
12 working groups and will be incorporated into future manuscripts that will focus on the  
13 curation approach for individual ClinGen disease-focused expert groups.

14 Ultra-rare disorders may have a relatively small number of probands described in the  
15 medical literature, thus limiting their potential to achieve a high genetic evidence score  
16 within this matrix. This obstacle is mostly circumvented by allowing compelling pieces of  
17 genetic evidence to score the maximum number of points (for example, see *CD3E* (MIM  
18 186830) and severe combined immunodeficiency (MIM 615615), detailed in the  
19 Supplemental Appendix). When substantial experimental evidence is also available,  
20 these conditions can attain a “Strong” or “Definitive” classification. On the opposite end  
21 of the spectrum are conditions that occur commonly in the general population, such as  
22 cancer, where the predominant etiology is multifactorial rather than monogenic. In the  
23 less common Mendelian cancer predisposition syndromes, incomplete penetrance is a

1 typical feature that can lead to confounding factors in family genetic studies such as  
2 apparently non-penetrant family members who carry a disease-associated variant and  
3 phenocopies among family members without a disease-associated variant. For such  
4 conditions, case-control data may provide more compelling evidence to support the  
5 gene-disease association (see the curation of *PALB2* (MIM 610355) and hereditary  
6 breast cancer (MIM 114480) in the Supplemental Appendix as an example).

7 One limitation of any such system is the challenge of balancing thorough literature  
8 curation and practical time commitment. This system can accommodate an exhaustive  
9 literature review, but in most cases will only require curating the amount of information  
10 sufficient to reach the maximum number of points in the matrix. In some scenarios this  
11 method may fail to include pertinent information, which could impact the classification  
12 (e.g., omission of contradictory evidence). Another potential limitation is the subjective  
13 nature of certain evidence types (e.g., experimental), which may lead to variability  
14 between different groups assessing evidence. However, due to the transparency of the  
15 evidence base, the incorporation of expert review, and the ability to reassess  
16 classifications over time, such drawbacks are likely to be self-limiting.

17 ClinGen's ultimate goal is to enhance the incorporation of genomic information into  
18 clinical care, an important component of the Precision Medicine Initiative<sup>13</sup>. The  
19 implementation of this framework will be supported by an open-access ClinGen curation  
20 interface (under development) that will guide curators through the curation process and  
21 will serve as a platform for extension to the community. In essence, this framework aims  
22 to provide a systematic, transparent method to evaluate a gene-disease relationship in  
23 an efficient and consistent manner suitable for a diverse set of users. A detailed

1 standard operating procedure for this framework is available on the ClinGen website. All  
2 curated evidence, including clinical validity assessments, will also be made readily  
3 accessible to clinical laboratories, clinicians, researchers, and the community via our  
4 website. Additionally, for community members that wish to contribute papers of interest  
5 and/or request curation of a gene-disease pair, a “reporter” form is available on the  
6 ClinGen website.

7 Carefully evaluated gene-disease clinical validity classifications, as provided by this  
8 framework, will be useful to clinical laboratories as they evaluate genes for inclusion on  
9 disease-targeted panels, or as they decide how to categorize, prioritize, and return  
10 results from exome/genome sequencing. Clinicians may choose to use these types of  
11 gene-disease classifications as they interpret laboratory results for the individuals they  
12 care for; for instance, they may choose not to adjust medical management based on  
13 variants in genes of limited clinical validity. Researchers could also utilize this  
14 framework to evaluate the clinical validity of their own newly discovered associations  
15 and identify promising target genes for future work in order to augment the currently  
16 available evidence and attain a “Strong” or “Definitive” classification. In addition,  
17 professional societies and regulatory bodies may utilize these clinical validity  
18 assessments when making recommendations or guidelines for clinical genetic testing.  
19 Ultimately, our systematic, evidence-based method for evaluating gene-disease  
20 associations will provide a strong foundation for genomic medicine.



1 **DESCRIPTION OF SUPPLEMENTAL DATA:**

2 The Supplemental file includes one figure, an appendix with curated evidence for each  
3 example presented in Figure 5, and a list of references. A more comprehensive  
4 supplemental file is available on the BioRxiv preprint server (see doi:  
5 <https://doi.org/10.1101/111039>)

6 **ACKNOWLEDGEMENTS:**

7 This work was supported by grants from the National Human Genome Research  
8 Institute (NHGRI), through the following three grants: U41 HG006834-01A1, U01  
9 HG007437-01, U01 HG007436-01, as well as from the National Cancer Institute (NCI)  
10 through the following contract: HHSN261200800001E. ClinGen also receives funding  
11 through the Eunice Kennedy Shriver National Institute of Child Health and Human  
12 Development (NICHD) and ClinVar is supported by the Intramural Research Program of  
13 the NIH, National Library of Medicine. We would like to thank the following groups and  
14 individuals for contributing their disease expertise to review the examples included in  
15 this manuscript: Alan Beggs Ph.D.; Alison Bertuch, M.D., Ph.D.; Rebecca H. Buckley,  
16 M.D.; Eugene Chung, M.D.; Bill Craigen M.D., Ph.D.; Jennifer M. Puck, M.D.; Sharon A.  
17 Savage, M.D.; Fergus J. Couch Ph.D. and the ClinGen Hereditary Breast and Ovarian  
18 Cancer gene curation working group; Birgit H. Funke Ph.D. and the ClinGen  
19 Cardiomyopathy gene curation working group; and the ClinGen RASopathy curation  
20 working group. Input on the framework was also provided by the ClinGen Hereditary  
21 Breast and Ovarian Cancer gene curation working group and Ray Hershberger, Mike  
22 Gollob and the ClinGen Channelopathy gene curation working group. We would also

1 like to thank Scott Goehringer for his invaluable help in preparing the curated examples  
2 for the ClinGen website and appendix.

3

4 **WEB RESOURCES:**

5 Clinical Genome Resource (ClinGen): [www.clinicalgenome.org](http://www.clinicalgenome.org)

6 ClinGen Gene Curation Working Group site: [https://www.clinicalgenome.org/working-](https://www.clinicalgenome.org/working-groups/gene-curation/)  
7 [groups/gene-curation/](https://www.clinicalgenome.org/working-groups/gene-curation/)

8 Standard operating procedure for the framework described in this manuscript:

9 <http://bit.ly/ClinGenGCSOP>

10 Validation Method for the framework described in this manuscript:

11 <http://bit.ly/clingenGCValMethods>

12 ClinGen “reporter” form: [https://search.clinicalgenome.org/kb/agents/sign\\_up](https://search.clinicalgenome.org/kb/agents/sign_up)

13 OMIM: <https://omim.org/>

## REFERENCES:

1. Online Mendelian Inheritance in Man, OMIM®. In. (Baltimore, MD, McKusick-Nathans Institute of Genetic Medicine, Johns Hopkins University
2. Chong, J.X., Buckingham, K.J., Jhangiani, S.N., Boehm, C., Sobreira, N., Smith, J.D., Harrell, T.M., McMillin, M.J., Wiszniewski, W., Gambin, T., et al. (2015). The Genetic Basis of Mendelian Phenotypes: Discoveries, Challenges, and Opportunities. *American journal of human genetics* 97, 199-215.
3. Haddow, J., Palomacki, G. (2003). ACCE: A Model Process for Evaluating Data on Emerging Genetic Tests. In *Human Genome Epidemiology: A Scientific Foundation for Using Genetic Information to Improve Health and Prevent Disease*, M. Khoury, Little, J., Burke, W., ed. (Oxford University Press), pp 217-233.
4. Wilfert, A.B., Chao, K.R., Kaushal, M., Jain, S., Zollner, S., Adams, D.R., and Conrad, D.F. (2016). Genome-wide significance testing of variation from single case exomes. *Nat Genet* 48, 1455-1461.
5. Eisenberger, T., Di Donato, N., Baig, S.M., Neuhaus, C., Beyer, A., Decker, E., Murbe, D., Decker, C., Bergmann, C., and Bolz, H.J. (2014). Targeted and genomewide NGS data disqualify mutations in MYO1A, the "DFNA48 gene", as a cause of deafness. *Human mutation* 35, 565-570.
6. Rehm, H.L., Berg, J.S., Brooks, L.D., Bustamante, C.D., Evans, J.P., Landrum, M.J., Ledbetter, D.H., Maglott, D.R., Martin, C.L., Nussbaum, R.L., et al. (2015). ClinGen--the Clinical Genome Resource. *The New England journal of medicine* 372, 2235-2242.
7. Lander, E., and Kruglyak, L. (1995). Genetic dissection of complex traits: guidelines for interpreting and reporting linkage results. *Nat Genet* 11, 241-247.
8. Sham, P.C., and Purcell, S.M. (2014). Statistical power and significance testing in large-scale genetic studies. *Nature reviews Genetics* 15, 335-346.
9. Lek, M., Karczewski, K.J., Minikel, E.V., Samocha, K.E., Banks, E., Fennell, T., O'Donnell-Luria, A.H., Ware, J.S., Hill, A.J., Cummings, B.B., et al. (2016). Analysis of protein-coding genetic variation in 60,706 humans. *Nature* 536, 285-291.
10. MacArthur, D.G., Manolio, T.A., Dimmock, D.P., Rehm, H.L., Shendure, J., Abecasis, G.R., Adams, D.R., Altman, R.B., Antonarakis, S.E., Ashley, E.A., et al. (2014). Guidelines for investigating causality of sequence variants in human disease. *Nature* 508, 469-476.
11. Landrum, M.J., Lee, J.M., Riley, G.R., Jang, W., Rubinstein, W.S., Church, D.M., and Maglott, D.R. (2014). ClinVar: public archive of relationships among sequence variation and human phenotype. *Nucleic acids research* 42, D980-985.
12. Fokkema, I.F., Taschner, P.E., Schaafsma, G.C., Celli, J., Laros, J.F., and den Dunnen, J.T. (2011). LOVD v.2.0: the next generation in gene variant databases. *Human mutation* 32, 557-563.

13. Collins, F.S., and Varmus, H. (2015). A new initiative on precision medicine. *The New England journal of medicine* 372, 793-795.

1 **FIGURE TITLES AND LEGENDS:**

2 **Figure 1: ClinGen clinical validity classifications and qualitative descriptions.** The  
3 suggested minimum criteria needed to obtain a given classification are described for  
4 each clinical validity classification. The types of evidence comprising these criteria are  
5 described in the text. The default classification for genes without a convincing human  
6 disease-causing variant is “No Reported Evidence.” The level of evidence needed for  
7 each supportive gene-disease association category builds upon the previous category  
8 (i.e. “Limited” builds upon “Moderate”). Gene-disease associations classified as  
9 “Contradictory” likely have supporting evidence as well as opposing evidence, but are  
10 described separately from the classifications for supportive gene-disease associations.

11 **Figure 2: Classes of genetic evidence and their relative weights used in the**  
12 **ClinGen clinical validity framework.** For additional points to consider when scoring  
13 genetic evidence, please see the standard operating procedure document available on  
14 our website. Genetic evidence is separated into two main categories: case-level data  
15 and case-control data. While a single publication may include both case-level and case-  
16 control data, individual cases should NOT be included in both categories. Each category  
17 is assigned a range of points with a maximum score that can be achieved. Case-Level  
18 Data is derived from studies describing individuals and/or families with qualifying  
19 variants in the gene of interest. Points should be assigned to each case based on the  
20 variant’s inheritance pattern, molecular consequence and evidence of pathogenicity in  
21 disease. In addition to variant evidence points, a gene-disease pair may also receive  
22 points for compelling segregation analysis (see Figure S1). Case-Control Data: Studies  
23 utilizing statistical analysis to evaluate variants in cases compared to controls. Case-

1 control studies can be classified as either single variant analysis or aggregate variant  
2 analysis, however the number of points allowable for either category is the same. Points  
3 should be assigned according to the overall quality of each study based on these  
4 criteria: variant detection methodology, power, bias and confounding factors, and  
5 statistical power. Note that the maximum total scores allowed for different types of  
6 Case-Level data are not intended to add up to the total points allowed for Genetic  
7 Evidence as a whole. This permits different combinations of evidence types to achieve  
8 the maximum total score.

9 **Figure 3: Types of gene-level experimental evidence and their relative weights**  
10 **used in the ClinGen clinical validity framework.** Experimental evidence types used in  
11 the ClinGen gene curation framework are modified from MacArthur, et al. 2014.  
12 Evidence types are divided into three categories based on their relative contribution to  
13 the overall clinical validity of a gene-disease pair giving more weight to *in vivo* data.  
14 Each category is assigned a range of points with a maximum score that can be  
15 achieved, allowing more weight to be given to *in vivo* data (e.g. Models & Rescue) over  
16 *in vitro* experimental data. Evidence within the function category is given the least  
17 weight and is comprised of the following types of evidence: biochemical function,  
18 interactions, and expression. Functional alteration experiments in cells from affected  
19 individuals carrying candidate pathogenic variants are given more weight than the  
20 function category. Finally, model systems and phenotypic rescue experiments are given  
21 the most weight in our framework. Note that the maximum total scores allowed for  
22 different categories of Experimental Evidence are not intended to add up to the total

1 allowable points. This permits different combinations of evidence types to achieve the  
2 maximum total score.

3 **Figure 4. Final summary matrix used to provisionally classify gene-disease**

4 **associations.** A summary matrix was designed to generate a “provisional” clinical

5 validity assessment using a point system consistent with the qualitative descriptions of

6 each classification. Genetic Evidence: total number of points (not exceeding 12)

7 obtained using the scoring metric in Fig. 2. If no human variants associated with disease

8 have been reported in the literature, then the default classification is “No Reported

9 Evidence.” Experimental Evidence: total number of points (not exceeding 6) derived

10 from each of the experimental categories in Fig. 3. Replication Over Time – Yes, if more

11 than three years has passed since the publication of the first paper reporting the gene-

12 disease relationship AND more than two publications with human mutations exist.

13 Contradictory Evidence – No points are assigned to this category. Instead, the curator

14 should provide a summary of contradictory information. Scoring - The sum of the

15 quantified evidence from each category can be used to determine a “provisional”

16 classification using the scale at the bottom of the figure. If a curator does not agree with

17 this classification, he/she may provide a different suggested classification along with

18 appropriate justification.

19 **Figure 5. Comparison of provisional clinical validity classifications and**

20 **associated matrix scores for selected gene-disease pairs evaluated by multiple**

21 **curators.** Of the 33 gene-disease pairs (y-axis) curated to validate the clinical validity

22 curation framework, 31 were classified using the summary matrix (2 gene-disease pairs,

23 *PMS2*:pancreatic cancer and *ARSD*:chondrodysplasia punctata, were classified as “No

1 evidence reported” and are not shown). Genetic evidence (grey bars) and experimental  
2 evidence (black bars) were evaluated by two independent curators (C1-C9) to arrive at  
3 a provisional classification (x-axis). Gene-disease relationships scoring between 12-18  
4 points can be “Strong” or “Definitive,” depending on whether the association has been  
5 replicated over time (indicated by the squared “r/t”), in which case the preliminary  
6 classification is “Definitive”. Clinical validity classifications that were discordant between  
7 preliminary curators are represented with a dashed background. Gene-disease pairs in  
8 which conflicting evidence was reported are represented by diagonal lines through the  
9 evidence bars and a grey background. The letter “C” in a triangle indicates that the  
10 curators classified the gene-disease pair as “Conflicting Evidence Reported”. Each  
11 gene-disease pair was ultimately evaluated by an expert in the field for a final  
12 classification (far right column). Final expert classifications that differed from the  
13 preliminary classification are indicated by italics and asterisks.



Table 1: Categorization of gene-disease pairs used to validate the gene-validity framework

| Disease category         | HGNC Gene Symbol | Gene MIM ID | Disease curated                                                          | Inheritance Pattern | Orphanet ID/ Phenotype MIM ID    | Expert Reviewed Classification <sup>a</sup> |
|--------------------------|------------------|-------------|--------------------------------------------------------------------------|---------------------|----------------------------------|---------------------------------------------|
| Bone Marrow Failure      | <i>NHP2</i>      | 606470      | Dyskeratosis congenita                                                   | Recessive           | ORPHA1775/MIM 613987             | Limited                                     |
|                          | <i>RAD51C</i>    | 602774      | Fanconi anemia                                                           | Recessive           | ORPHA84/MIM 613390               | Moderate                                    |
|                          | <i>RPS10</i>     | 603632      | Diamond-Blackfan anemia                                                  | Dominant            | ORPHA124/MIM 613308              | Definitive                                  |
|                          | <i>RPS24</i>     | 602412      | Diamond-Blackfan anemia                                                  | Dominant            | ORPHA124/MIM 610629              | Definitive                                  |
|                          | <i>TSR2</i>      | 300945      | Diamond-Blackfan anemia with mandibulofacial dysostosis                  | X-Linked            | ORPHA124/MIM 300946              | Limited                                     |
|                          | <i>WRAP53</i>    | 612661      | Dyskeratosis congenita                                                   | Recessive           | ORPHA1775/MIM 613988             | Moderate                                    |
| Cardiovascular Disorders | <i>AKAP9</i>     | 604001      | Romano-Ward syndrome                                                     | Dominant            | ORPHA101016/MIM 611820           | Limited                                     |
|                          | <i>SCN4B</i>     | 608256      | Long QT syndrome                                                         | Dominant            | ORPHA768/MIM 611819              | Limited                                     |
|                          | <i>SMAD3</i>     | 603109      | Loeys-Dietz type 3                                                       | Dominant            | ORPHA284984/MIM 613795           | Definitive                                  |
|                          | <i>TMPO</i>      | 188380      | Familial or idiopathic dilated cardiomyopathy                            | Dominant            | ORPHA154/MIM 613740 <sup>b</sup> | Contradictory (refuted)                     |
| Hereditary Cancer        | <i>DICER1</i>    | 606241      | Pleuropulmonary blastoma                                                 | Dominant            | ORPHA64742/MIM 601200            | Definitive                                  |
|                          | <i>PALB2</i>     | 610355      | Hereditary breast cancer                                                 | Dominant            | ORPHA227535/MIM 114480           | Definitive                                  |
|                          | <i>PMS2</i>      | 600259      | Hereditary pancreatic cancer                                             | N/A                 | N/A                              | No Reported Evidence                        |
|                          | <i>RAD51D</i>    | 602954      | Hereditary breast cancer                                                 | Dominant            | ORPHA227535/MIM 614291           | Limited                                     |
| Immune Disorders         | <i>C1QB</i>      | 120570      | Immunodeficiency due to C1Q deficiency                                   | Recessive           | ORPHA169147/MIM 613652           | Definitive                                  |
|                          | <i>CD3E</i>      | 186830      | Severe combined immunodeficiency                                         | Recessive           | ORPHA183660/MIM 615615           | Definitive                                  |
| Skeletal Dysplasia       | <i>ARSD</i>      | 300002      | Chondrodysplasia punctata                                                | N/A                 | N/A                              | No Reported Evidence                        |
|                          | <i>COL2A1</i>    | 120140      | Spondyloepiphyseal dysplasia (Stanescu type)                             | Dominant            | ORPHA94068/MIM 616583            | Moderate                                    |
|                          | <i>FGFR3</i>     | 134934      | Achondroplasia                                                           | Dominant            | ORPHA15/MIM 100800               | Definitive                                  |
|                          | <i>LBR</i>       | 600024      | Anadysplasia-like, spontaneously remitting spondylometaphyseal dysplasia | Recessive           | ORPHA448267/None                 | Moderate                                    |

bioRxiv preprint doi: <https://doi.org/10.1101/111039>; this version posted April 13, 2017. The copyright holder for this preprint (which was not certified by peer review) is the author/funder, who has granted bioRxiv a license to display the preprint in perpetuity. It is made available under aCC-BY-NC-ND 4.0 International license.

|                         |                |                 |                                                                   |                     |                         |                          |
|-------------------------|----------------|-----------------|-------------------------------------------------------------------|---------------------|-------------------------|--------------------------|
| Neuromuscular Disorders | <i>BAG3</i>    | 603883          | Myofibrillar myopathy                                             | Dominant            | ORPHA593/MIM 612954     | Definitive               |
|                         | <i>MYO9A</i>   | 604875          | Arthrogryposis                                                    | Recessive           | ORPHA109007/None        | Limited                  |
|                         | <i>PSD3</i>    | 614440          | Antecubital pterygium syndrome                                    | Dominant            | ORPHA2987/None          | Limited                  |
|                         | <i>VPS8</i>    | N/A             | Arthrogryposis                                                    | Recessive           | ORPHA109007/None        | Limited                  |
| Miscellaneous           | <i>AGTR2</i>   | 300034          | X-linked non-syndromic intellectual disability                    | X-Linked            | ORPHA777/None           | Contradictory (Disputed) |
|                         | <i>ATF6</i>    | 605537          | Achromatopsia                                                     | Recessive           | ORPHA49382/MIM 616517   | Strong                   |
|                         | <i>CHD1L</i>   | 613039          | Renal or urinary tract malformation                               | Dominant            | ORPHA93545/None         | Limited                  |
|                         | <i>HNRNPK</i>  | 600712          | Au-Kline syndrome                                                 | Dominant            | ORPHA453504 /MIM 616580 | Moderate                 |
|                         | <i>LAMB1</i>   | 150240          | Lissencephaly 5                                                   | Recessive           | ORPHA352682/MIM 615191  | Moderate                 |
|                         | <i>NGLY1</i>   | 610661          | Congenital disorder of deglycosylation                            | Recessive           | ORPHA404454/MIM 615273  | Definitive               |
|                         | <i>SMARCA1</i> | 300012          | Syndromic intellectual disability with Coffin-Syris-like features | Dominant            | None/None               | Moderate                 |
|                         | <i>SKI</i>     | 164780          | Shprintzen-Goldberg                                               | Dominant            | ORPHA311140/MIM 182212  | Definitive               |
| <i>SOS2</i>             | 601247         | Noonan syndrome | Dominant                                                          | ORPHA648/MIM 616559 | Moderate                |                          |

<sup>a</sup> All gene-disease classifications are accurate as of January 2017.

<sup>b</sup> Phenotype MIM was associated with *TMPO* at the time of curation, but has since been removed due to updated information.

Abbreviations: N/A, not applicable.

| Evidence Level                                                                                                                                                                                                                                                                                                                                                                                                      |                                      | Evidence Description                                                                                                                                                                                                                                                                                                                                                                                                                                                                                                                                                                                                                                                                                                                                                                                                                                                                                                                                                                                                                                                                                                                                                 |
|---------------------------------------------------------------------------------------------------------------------------------------------------------------------------------------------------------------------------------------------------------------------------------------------------------------------------------------------------------------------------------------------------------------------|--------------------------------------|----------------------------------------------------------------------------------------------------------------------------------------------------------------------------------------------------------------------------------------------------------------------------------------------------------------------------------------------------------------------------------------------------------------------------------------------------------------------------------------------------------------------------------------------------------------------------------------------------------------------------------------------------------------------------------------------------------------------------------------------------------------------------------------------------------------------------------------------------------------------------------------------------------------------------------------------------------------------------------------------------------------------------------------------------------------------------------------------------------------------------------------------------------------------|
| <b>Supportive Evidence</b>                                                                                                                                                                                                                                                                                                                                                                                          | <b>DEFINITIVE</b>                    | The role of this gene in this particular disease has been repeatedly demonstrated in both the research and clinical diagnostic settings, and has been upheld over time (in general, at least 3 years). No convincing evidence has emerged that contradicts the role of the gene in the specified disease.                                                                                                                                                                                                                                                                                                                                                                                                                                                                                                                                                                                                                                                                                                                                                                                                                                                            |
|                                                                                                                                                                                                                                                                                                                                                                                                                     | <b>STRONG</b>                        | <p>The role of this gene in disease has been independently demonstrated typically in at least two separate studies providing <b>strong</b> supporting evidence for this gene's role in disease, usually including both of the following types of evidence:</p> <ul style="list-style-type: none"> <li>• Strong variant-level evidence demonstrating numerous unrelated probands with variants that provide convincing evidence for disease causality<sup>1</sup> <b>as well as</b></li> <li>• Compelling gene-level evidence from different types of supporting experimental data<sup>2</sup>.</li> </ul> <p>In addition, no convincing evidence has emerged that contradicts the role of the gene in the noted disease.</p>                                                                                                                                                                                                                                                                                                                                                                                                                                         |
|                                                                                                                                                                                                                                                                                                                                                                                                                     | <b>MODERATE</b>                      | <p>There is <b>moderate</b> evidence to support a causal role for this gene in this disease, typically including both of the following types of evidence:</p> <ul style="list-style-type: none"> <li>• Several probands with variants that provide convincing evidence for disease causality<sup>1</sup></li> <li>• Moderate experimental data<sup>2</sup> supporting the gene-disease association</li> </ul> <p>The role of this gene in disease may not have been independently reported, but no convincing evidence has emerged that contradicts the role of the gene in the noted disease.</p>                                                                                                                                                                                                                                                                                                                                                                                                                                                                                                                                                                   |
|                                                                                                                                                                                                                                                                                                                                                                                                                     | <b>LIMITED</b>                       | <p>There is <b>limited</b> evidence to support a causal role for this gene in this disease, such as:</p> <ul style="list-style-type: none"> <li>• Fewer than three observations of variants that provide convincing evidence for disease causality<sup>1</sup> OR</li> <li>• Variants have been observed in probands, but none have sufficient evidence for disease causality.</li> <li>• Limited experimental data<sup>2</sup> supporting the gene-disease association</li> </ul> <p>The role of this gene in disease may not have been independently reported, but no convincing evidence has emerged that contradicts the role of the gene in the noted disease.</p>                                                                                                                                                                                                                                                                                                                                                                                                                                                                                              |
|                                                                                                                                                                                                                                                                                                                                                                                                                     | <b>NO REPORTED EVIDENCE</b>          | Evidence for a causal role in disease has not been reported. These genes might be "candidate" genes based on linkage intervals, animal models, implication in pathways known to be involved in human diseases, etc., but no reports have directly implicated the gene in human disease cases.                                                                                                                                                                                                                                                                                                                                                                                                                                                                                                                                                                                                                                                                                                                                                                                                                                                                        |
| <b>Contradictory Evidence</b>                                                                                                                                                                                                                                                                                                                                                                                       | <b>CONFLICTING EVIDENCE REPORTED</b> | <p>Although there has been an assertion of a gene-disease association, conflicting evidence for the role of this gene in disease has arisen since the time of the initial report indicating a disease association. Depending on the quantity and quality of evidence disputing the association, the association may be further defined by the following two sub-categories:</p> <ol style="list-style-type: none"> <li><b>1. Disputed</b> <ol style="list-style-type: none"> <li>a. Convincing evidence <i>disputing</i> a role for this gene in this disease has arisen since the initial report identifying an association between the gene and disease.</li> <li>b. Refuting evidence need not outweigh existing evidence supporting the gene:disease association.</li> </ol> </li> <li><b>2. Refuted</b> <ol style="list-style-type: none"> <li>a. Evidence refuting the role of the gene in the specified disease has been reported and significantly outweighs any evidence supporting the role.</li> <li>b. This designation is to be applied at the discretion of clinical domain experts after thorough review of available evidence</li> </ol> </li> </ol> |
| <b>NOTES</b>                                                                                                                                                                                                                                                                                                                                                                                                        |                                      |                                                                                                                                                                                                                                                                                                                                                                                                                                                                                                                                                                                                                                                                                                                                                                                                                                                                                                                                                                                                                                                                                                                                                                      |
| <p><sup>1</sup>Variants that disrupt function and/or have other strong genetic and population data (e.g. <i>de novo</i> occurrence, absence in controls, strong linkage to a small genomic interval, etc.) are considered convincing of disease causality in this framework.</p> <p><sup>2</sup>Examples of appropriate types of supporting experimental data based on those outlined in MacArthur et al. 2014.</p> |                                      |                                                                                                                                                                                                                                                                                                                                                                                                                                                                                                                                                                                                                                                                                                                                                                                                                                                                                                                                                                                                                                                                                                                                                                      |

Figure 2

|                                                                                                                                                                                                                                                                                                                                                                                                                                                                                                                                                                                                                                                                                                                                                                                                                                                                                                                                                                                                                                                                                                                                                                                                                                                                                                                                                                                                                                                                                                                                                                                                                                                                                                                                                                                                                                                                                                                                                                                                                                                                                                                                                                                                                                                                                                                                                                                                                                                                                                                                                                                                                                                                                                                                                                                                                                                                                                                                                                                                                                                                                                                                                                                                                                                                                                                                                                                                                                                                                                                                                                                                                                                                                                                                                                                                                                                                                                                                                                                                                                                  | Evidence Type                                                                                           |                                                      | Case Information                                                                                                          |                    | Suggested Points/Case  |       | Points Given | Max Score |
|--------------------------------------------------------------------------------------------------------------------------------------------------------------------------------------------------------------------------------------------------------------------------------------------------------------------------------------------------------------------------------------------------------------------------------------------------------------------------------------------------------------------------------------------------------------------------------------------------------------------------------------------------------------------------------------------------------------------------------------------------------------------------------------------------------------------------------------------------------------------------------------------------------------------------------------------------------------------------------------------------------------------------------------------------------------------------------------------------------------------------------------------------------------------------------------------------------------------------------------------------------------------------------------------------------------------------------------------------------------------------------------------------------------------------------------------------------------------------------------------------------------------------------------------------------------------------------------------------------------------------------------------------------------------------------------------------------------------------------------------------------------------------------------------------------------------------------------------------------------------------------------------------------------------------------------------------------------------------------------------------------------------------------------------------------------------------------------------------------------------------------------------------------------------------------------------------------------------------------------------------------------------------------------------------------------------------------------------------------------------------------------------------------------------------------------------------------------------------------------------------------------------------------------------------------------------------------------------------------------------------------------------------------------------------------------------------------------------------------------------------------------------------------------------------------------------------------------------------------------------------------------------------------------------------------------------------------------------------------------------------------------------------------------------------------------------------------------------------------------------------------------------------------------------------------------------------------------------------------------------------------------------------------------------------------------------------------------------------------------------------------------------------------------------------------------------------------------------------------------------------------------------------------------------------------------------------------------------------------------------------------------------------------------------------------------------------------------------------------------------------------------------------------------------------------------------------------------------------------------------------------------------------------------------------------------------------------------------------------------------------------------------------------------------------|---------------------------------------------------------------------------------------------------------|------------------------------------------------------|---------------------------------------------------------------------------------------------------------------------------|--------------------|------------------------|-------|--------------|-----------|
|                                                                                                                                                                                                                                                                                                                                                                                                                                                                                                                                                                                                                                                                                                                                                                                                                                                                                                                                                                                                                                                                                                                                                                                                                                                                                                                                                                                                                                                                                                                                                                                                                                                                                                                                                                                                                                                                                                                                                                                                                                                                                                                                                                                                                                                                                                                                                                                                                                                                                                                                                                                                                                                                                                                                                                                                                                                                                                                                                                                                                                                                                                                                                                                                                                                                                                                                                                                                                                                                                                                                                                                                                                                                                                                                                                                                                                                                                                                                                                                                                                                  |                                                                                                         |                                                      |                                                                                                                           |                    | Default                | Range |              |           |
| Case-Level Data                                                                                                                                                                                                                                                                                                                                                                                                                                                                                                                                                                                                                                                                                                                                                                                                                                                                                                                                                                                                                                                                                                                                                                                                                                                                                                                                                                                                                                                                                                                                                                                                                                                                                                                                                                                                                                                                                                                                                                                                                                                                                                                                                                                                                                                                                                                                                                                                                                                                                                                                                                                                                                                                                                                                                                                                                                                                                                                                                                                                                                                                                                                                                                                                                                                                                                                                                                                                                                                                                                                                                                                                                                                                                                                                                                                                                                                                                                                                                                                                                                  | Variant Evidence                                                                                        | Autosomal Dominant OR X-Linked Disorder <sup>1</sup> | Variant is <i>de novo</i> <sup>2</sup>                                                                                    |                    | 2                      | 0-3   |              | 12        |
|                                                                                                                                                                                                                                                                                                                                                                                                                                                                                                                                                                                                                                                                                                                                                                                                                                                                                                                                                                                                                                                                                                                                                                                                                                                                                                                                                                                                                                                                                                                                                                                                                                                                                                                                                                                                                                                                                                                                                                                                                                                                                                                                                                                                                                                                                                                                                                                                                                                                                                                                                                                                                                                                                                                                                                                                                                                                                                                                                                                                                                                                                                                                                                                                                                                                                                                                                                                                                                                                                                                                                                                                                                                                                                                                                                                                                                                                                                                                                                                                                                                  |                                                                                                         |                                                      | Proband with predicted or proven null variant <sup>3</sup>                                                                |                    | 1.5                    | 0-2   |              | 10        |
|                                                                                                                                                                                                                                                                                                                                                                                                                                                                                                                                                                                                                                                                                                                                                                                                                                                                                                                                                                                                                                                                                                                                                                                                                                                                                                                                                                                                                                                                                                                                                                                                                                                                                                                                                                                                                                                                                                                                                                                                                                                                                                                                                                                                                                                                                                                                                                                                                                                                                                                                                                                                                                                                                                                                                                                                                                                                                                                                                                                                                                                                                                                                                                                                                                                                                                                                                                                                                                                                                                                                                                                                                                                                                                                                                                                                                                                                                                                                                                                                                                                  |                                                                                                         |                                                      | Proband with other variant type with some evidence of gene impact <sup>4</sup>                                            |                    | 0.5                    | 0-1.5 |              | 7         |
|                                                                                                                                                                                                                                                                                                                                                                                                                                                                                                                                                                                                                                                                                                                                                                                                                                                                                                                                                                                                                                                                                                                                                                                                                                                                                                                                                                                                                                                                                                                                                                                                                                                                                                                                                                                                                                                                                                                                                                                                                                                                                                                                                                                                                                                                                                                                                                                                                                                                                                                                                                                                                                                                                                                                                                                                                                                                                                                                                                                                                                                                                                                                                                                                                                                                                                                                                                                                                                                                                                                                                                                                                                                                                                                                                                                                                                                                                                                                                                                                                                                  |                                                                                                         | Autosomal Recessive                                  | Two variants in <i>trans</i> and at least one <i>de novo</i> <sup>2</sup> or a predicted/proven null variant <sup>3</sup> |                    | 2                      | 0-3   |              | 12        |
|                                                                                                                                                                                                                                                                                                                                                                                                                                                                                                                                                                                                                                                                                                                                                                                                                                                                                                                                                                                                                                                                                                                                                                                                                                                                                                                                                                                                                                                                                                                                                                                                                                                                                                                                                                                                                                                                                                                                                                                                                                                                                                                                                                                                                                                                                                                                                                                                                                                                                                                                                                                                                                                                                                                                                                                                                                                                                                                                                                                                                                                                                                                                                                                                                                                                                                                                                                                                                                                                                                                                                                                                                                                                                                                                                                                                                                                                                                                                                                                                                                                  | Two variants (not predicted/proven null) with some evidence of gene impact <sup>4</sup> in <i>trans</i> |                                                      | 1                                                                                                                         | 0-1.5              |                        |       |              |           |
|                                                                                                                                                                                                                                                                                                                                                                                                                                                                                                                                                                                                                                                                                                                                                                                                                                                                                                                                                                                                                                                                                                                                                                                                                                                                                                                                                                                                                                                                                                                                                                                                                                                                                                                                                                                                                                                                                                                                                                                                                                                                                                                                                                                                                                                                                                                                                                                                                                                                                                                                                                                                                                                                                                                                                                                                                                                                                                                                                                                                                                                                                                                                                                                                                                                                                                                                                                                                                                                                                                                                                                                                                                                                                                                                                                                                                                                                                                                                                                                                                                                  | Segregation Evidence                                                                                    |                                                      | Evidence of segregation in one or more families <sup>5</sup>                                                              | LOD Score Examples |                        |       | 0-7          |           |
|                                                                                                                                                                                                                                                                                                                                                                                                                                                                                                                                                                                                                                                                                                                                                                                                                                                                                                                                                                                                                                                                                                                                                                                                                                                                                                                                                                                                                                                                                                                                                                                                                                                                                                                                                                                                                                                                                                                                                                                                                                                                                                                                                                                                                                                                                                                                                                                                                                                                                                                                                                                                                                                                                                                                                                                                                                                                                                                                                                                                                                                                                                                                                                                                                                                                                                                                                                                                                                                                                                                                                                                                                                                                                                                                                                                                                                                                                                                                                                                                                                                  |                                                                                                         |                                                      |                                                                                                                           | 3                  | 5                      |       |              |           |
|                                                                                                                                                                                                                                                                                                                                                                                                                                                                                                                                                                                                                                                                                                                                                                                                                                                                                                                                                                                                                                                                                                                                                                                                                                                                                                                                                                                                                                                                                                                                                                                                                                                                                                                                                                                                                                                                                                                                                                                                                                                                                                                                                                                                                                                                                                                                                                                                                                                                                                                                                                                                                                                                                                                                                                                                                                                                                                                                                                                                                                                                                                                                                                                                                                                                                                                                                                                                                                                                                                                                                                                                                                                                                                                                                                                                                                                                                                                                                                                                                                                  |                                                                                                         |                                                      |                                                                                                                           | 2                  | 4                      |       |              |           |
|                                                                                                                                                                                                                                                                                                                                                                                                                                                                                                                                                                                                                                                                                                                                                                                                                                                                                                                                                                                                                                                                                                                                                                                                                                                                                                                                                                                                                                                                                                                                                                                                                                                                                                                                                                                                                                                                                                                                                                                                                                                                                                                                                                                                                                                                                                                                                                                                                                                                                                                                                                                                                                                                                                                                                                                                                                                                                                                                                                                                                                                                                                                                                                                                                                                                                                                                                                                                                                                                                                                                                                                                                                                                                                                                                                                                                                                                                                                                                                                                                                                  |                                                                                                         |                                                      |                                                                                                                           | 1.5                | 3                      |       |              |           |
|                                                                                                                                                                                                                                                                                                                                                                                                                                                                                                                                                                                                                                                                                                                                                                                                                                                                                                                                                                                                                                                                                                                                                                                                                                                                                                                                                                                                                                                                                                                                                                                                                                                                                                                                                                                                                                                                                                                                                                                                                                                                                                                                                                                                                                                                                                                                                                                                                                                                                                                                                                                                                                                                                                                                                                                                                                                                                                                                                                                                                                                                                                                                                                                                                                                                                                                                                                                                                                                                                                                                                                                                                                                                                                                                                                                                                                                                                                                                                                                                                                                  |                                                                                                         |                                                      |                                                                                                                           | 1                  | 1.5                    |       |              |           |
| Case-Control Data                                                                                                                                                                                                                                                                                                                                                                                                                                                                                                                                                                                                                                                                                                                                                                                                                                                                                                                                                                                                                                                                                                                                                                                                                                                                                                                                                                                                                                                                                                                                                                                                                                                                                                                                                                                                                                                                                                                                                                                                                                                                                                                                                                                                                                                                                                                                                                                                                                                                                                                                                                                                                                                                                                                                                                                                                                                                                                                                                                                                                                                                                                                                                                                                                                                                                                                                                                                                                                                                                                                                                                                                                                                                                                                                                                                                                                                                                                                                                                                                                                | Case-Control Study Type                                                                                 |                                                      | Case-Control Quality Criteria <sup>6</sup>                                                                                |                    | Suggested Points/Study |       | Points Given | Max Score |
|                                                                                                                                                                                                                                                                                                                                                                                                                                                                                                                                                                                                                                                                                                                                                                                                                                                                                                                                                                                                                                                                                                                                                                                                                                                                                                                                                                                                                                                                                                                                                                                                                                                                                                                                                                                                                                                                                                                                                                                                                                                                                                                                                                                                                                                                                                                                                                                                                                                                                                                                                                                                                                                                                                                                                                                                                                                                                                                                                                                                                                                                                                                                                                                                                                                                                                                                                                                                                                                                                                                                                                                                                                                                                                                                                                                                                                                                                                                                                                                                                                                  | Single Variant Analysis                                                                                 |                                                      | • Variant Detection Methodology <sup>6a</sup><br>• Power <sup>6b</sup>                                                    |                    | 0-6                    |       |              | 12        |
|                                                                                                                                                                                                                                                                                                                                                                                                                                                                                                                                                                                                                                                                                                                                                                                                                                                                                                                                                                                                                                                                                                                                                                                                                                                                                                                                                                                                                                                                                                                                                                                                                                                                                                                                                                                                                                                                                                                                                                                                                                                                                                                                                                                                                                                                                                                                                                                                                                                                                                                                                                                                                                                                                                                                                                                                                                                                                                                                                                                                                                                                                                                                                                                                                                                                                                                                                                                                                                                                                                                                                                                                                                                                                                                                                                                                                                                                                                                                                                                                                                                  | Aggregate Variant Analysis                                                                              |                                                      | • Bias and Confounding Factors <sup>6c</sup><br>• Statistical Significance <sup>6d</sup>                                  |                    | 0-6                    |       |              |           |
| <b>TOTAL ALLOWABLE POINTS for Genetic Evidence</b>                                                                                                                                                                                                                                                                                                                                                                                                                                                                                                                                                                                                                                                                                                                                                                                                                                                                                                                                                                                                                                                                                                                                                                                                                                                                                                                                                                                                                                                                                                                                                                                                                                                                                                                                                                                                                                                                                                                                                                                                                                                                                                                                                                                                                                                                                                                                                                                                                                                                                                                                                                                                                                                                                                                                                                                                                                                                                                                                                                                                                                                                                                                                                                                                                                                                                                                                                                                                                                                                                                                                                                                                                                                                                                                                                                                                                                                                                                                                                                                               |                                                                                                         |                                                      |                                                                                                                           |                    |                        |       |              | <b>12</b> |
| <p><b>General Notes</b></p> <ul style="list-style-type: none"> <li>Detailed guidance for utilizing this scoring matrix is available on the ClinGen website in the standard operating procedure.</li> <li>All variants under consideration should be rare enough in the general population to be consistent with disease.</li> <li>Cohorts/cases should not be double counted. For example, individual cases included as part of case-control studies should not be given points from both the "Case Level Data" and "Case-Control Data" categories.</li> <li>Case-Level Data includes studies describing individuals or families with variation in the gene of interest</li> <li>Case-Control studies are those in which statistical analysis is used to evaluate variation in cases compared to controls.</li> </ul> <p><b>Numbered Footnotes</b></p> <ol style="list-style-type: none"> <li>In X-linked disorders, affected probands will often be hemizygous males and/or heterozygous females. Recognizing that there can be rare cases of females affected by X-linked recessive disorders (due to chromosomal aneuploidy, skewed X inactivation, or homozygosity for a sequence variant) evaluators must interpret individual cases and X-linked pedigrees with caution.</li> <li>Points should be adjusted depending on statistical expectation of <i>de novo</i> variation in the gene in question for variants.</li> <li>Null variants (typically nonsense, frameshift, canonical +/-1 or 2 splice sites, initiation codon, single or multi-exon deletions) are considered "very strong evidence for pathogenicity" in genes for which loss of function is a known disease mechanism. Disease mechanism can be assumed loss of function (LOF) if the gene is LOF constrained. LOF constraint scores must be interpreted in the context of the disease in question.</li> <li>For variants that are NOT "null" (typically missense), at least some impact to gene function must be demonstrated for the case to count.</li> <li>LOD scores reported by the authors of a peer-reviewed journal article may be used to assign segregation points as outlined in the scoring matrix above. If a LOD score is not provided by the authors, one may be estimated for informative families with rare, highly penetrant disorders in which phenocopies are expected to be rare or absent. Guidelines for calculating estimated LOD scores are included in the Figure S1.</li> <li>Points for case-control studies may be assigned at the discretion of expert opinion based on the overall quality of each study. The following should be considered when evaluating case-control study quality: <ol style="list-style-type: none"> <li><i>Variant Detection Methodology</i>: Cases and controls should ideally be analyzed using methods with equivalent analytical performance (e.g. equivalent genotype methods, sufficient and equivalent depth and quality of sequencing coverage, correction for batch effects).</li> <li><i>Power</i>: The study should analyze a sufficient number of cases and controls given the prevalence of the disease, the allele frequency, and the expected effect size in question to provide appropriate statistical power to detect an association.</li> <li><i>Bias and Confounding factors</i>: The manner in which cases and controls were selected for participation and the degree of case-control matching may impact the outcome of the study.</li> <li><i>Statistical Significance</i> – The level of statistical significance should be weighed carefully. When an odds ratio is presented, its magnitude should be consistent with a monogenic disease etiology. When p-values or 95% confidence intervals (CI) are presented, the strength of the statistical association can be weighed in the final points assigned. Factors, such as multiple testing, that might impact that interpretation of uncorrected p-values and CIs should be considered when assigning points</li> </ol> </li> </ol> |                                                                                                         |                                                      |                                                                                                                           |                    |                        |       |              |           |

Figure 3

| Evidence Category                                       | Evidence Type                   | Suggested Points |       | Points Given | Max      |
|---------------------------------------------------------|---------------------------------|------------------|-------|--------------|----------|
|                                                         |                                 | Default          | Range |              |          |
| Function                                                | Biochemical Function            | 0.5              | 0-2   |              | 2        |
|                                                         | Protein Interaction             |                  | 0-2   |              |          |
|                                                         | Expression                      |                  | 0-2   |              |          |
| Functional Alteration                                   | Cells from affected individual  | 1                | 0-2   |              | 2        |
|                                                         | Engineered cells                | 0.5              | 0-1   |              |          |
| Models & Rescue                                         | Animal model                    | 2                | 0-4   |              | 4        |
|                                                         | Cell culture model system       | 1                | 0-2   |              |          |
|                                                         | Rescue in animal model          | 2                | 0-4   |              |          |
|                                                         | Rescue in engineered equivalent | 1                | 0-2   |              |          |
| <b>Total Allowable Points for Experimental Evidence</b> |                                 |                  |       |              | <b>6</b> |

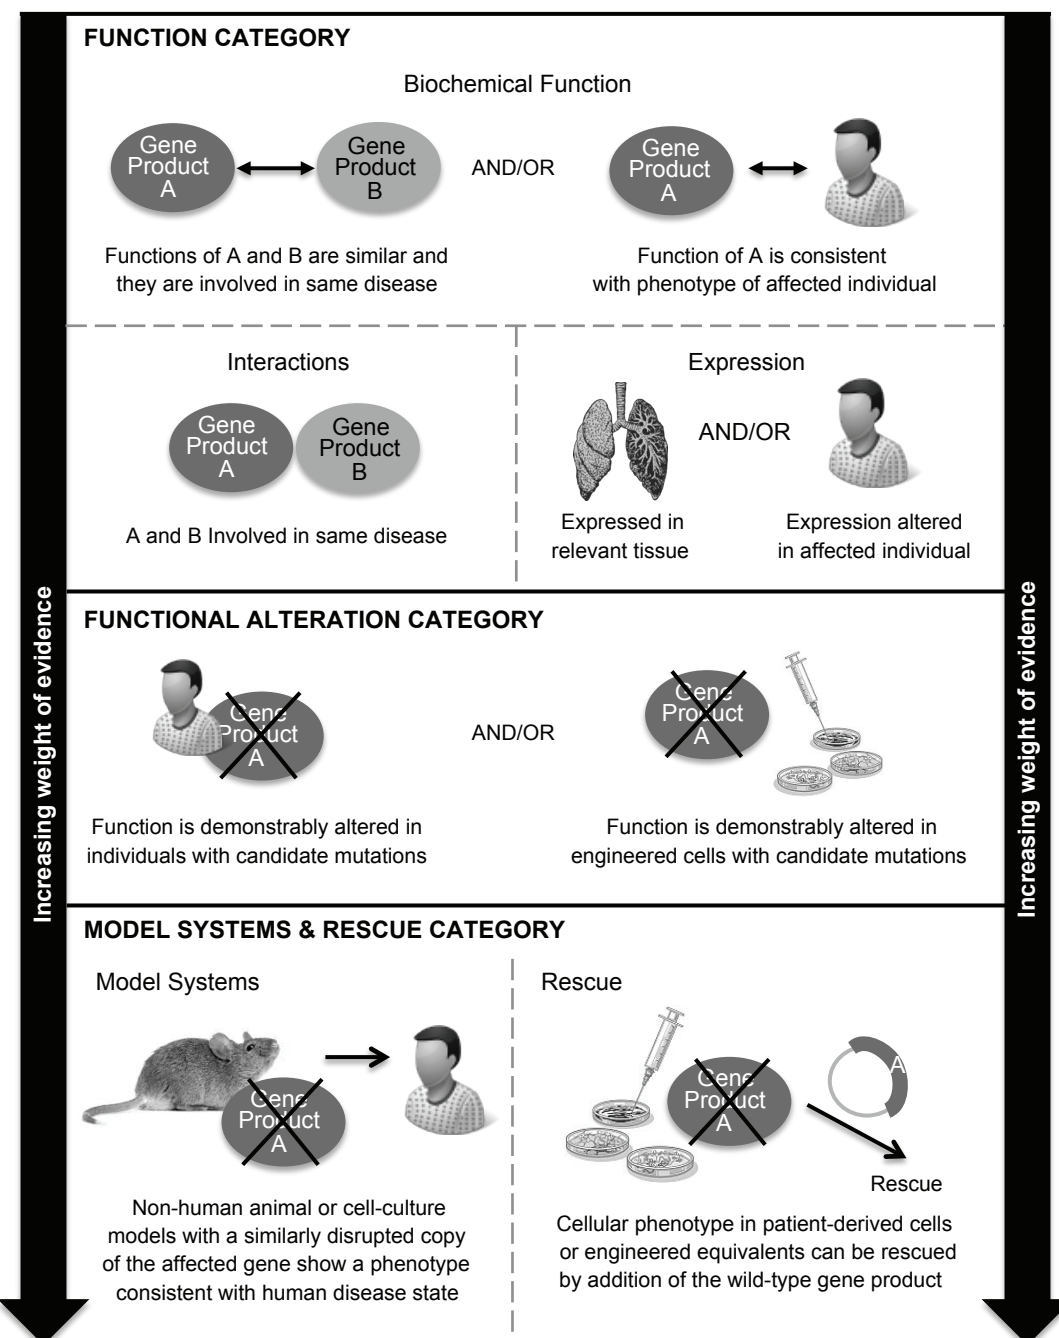

## Clinical Validity Summary Matrix

| <b>GENE/DISEASE PAIR:</b>                  |                                                                                                |                                                                            |                                             |                                                    |
|--------------------------------------------|------------------------------------------------------------------------------------------------|----------------------------------------------------------------------------|---------------------------------------------|----------------------------------------------------|
| <b>Assertion criteria</b>                  | <b>Genetic Evidence (0-12 points)</b>                                                          | <b>Experimental Evidence (0-6 points)</b>                                  | <b>Total Points (0-18)</b>                  | <b>Replication Over Time (Y/N)</b>                 |
| <b>Description</b>                         | Case-level, family segregation, or case-control data that support the gene-disease association | Gene-level experimental evidence that support the gene-disease association | Sum of Genetic & Experimental Evidence      | > 2 pubs w/ convincing evidence over time (>3 yrs) |
| <b>Assigned Points</b>                     |                                                                                                |                                                                            |                                             |                                                    |
| <b>CALCULATED CLASSIFICATION</b>           |                                                                                                | <b>LIMITED</b>                                                             | <b>1-6</b>                                  |                                                    |
|                                            |                                                                                                | <b>MODERATE</b>                                                            | <b>7-11</b>                                 |                                                    |
|                                            |                                                                                                | <b>STRONG</b>                                                              | <b>12-18</b>                                |                                                    |
|                                            |                                                                                                | <b>DEFINITIVE</b>                                                          | <b>12-18<br/>&amp; Replicated Over Time</b> |                                                    |
| <b>Valid contradictory evidence (Y/N)*</b> | <b>List PMIDs and describe evidence:</b>                                                       |                                                                            |                                             |                                                    |
| <b>CURATOR CLASSIFICATION</b>              |                                                                                                |                                                                            |                                             |                                                    |
| <b>FINAL CLASSIFICATION</b>                |                                                                                                |                                                                            |                                             |                                                    |

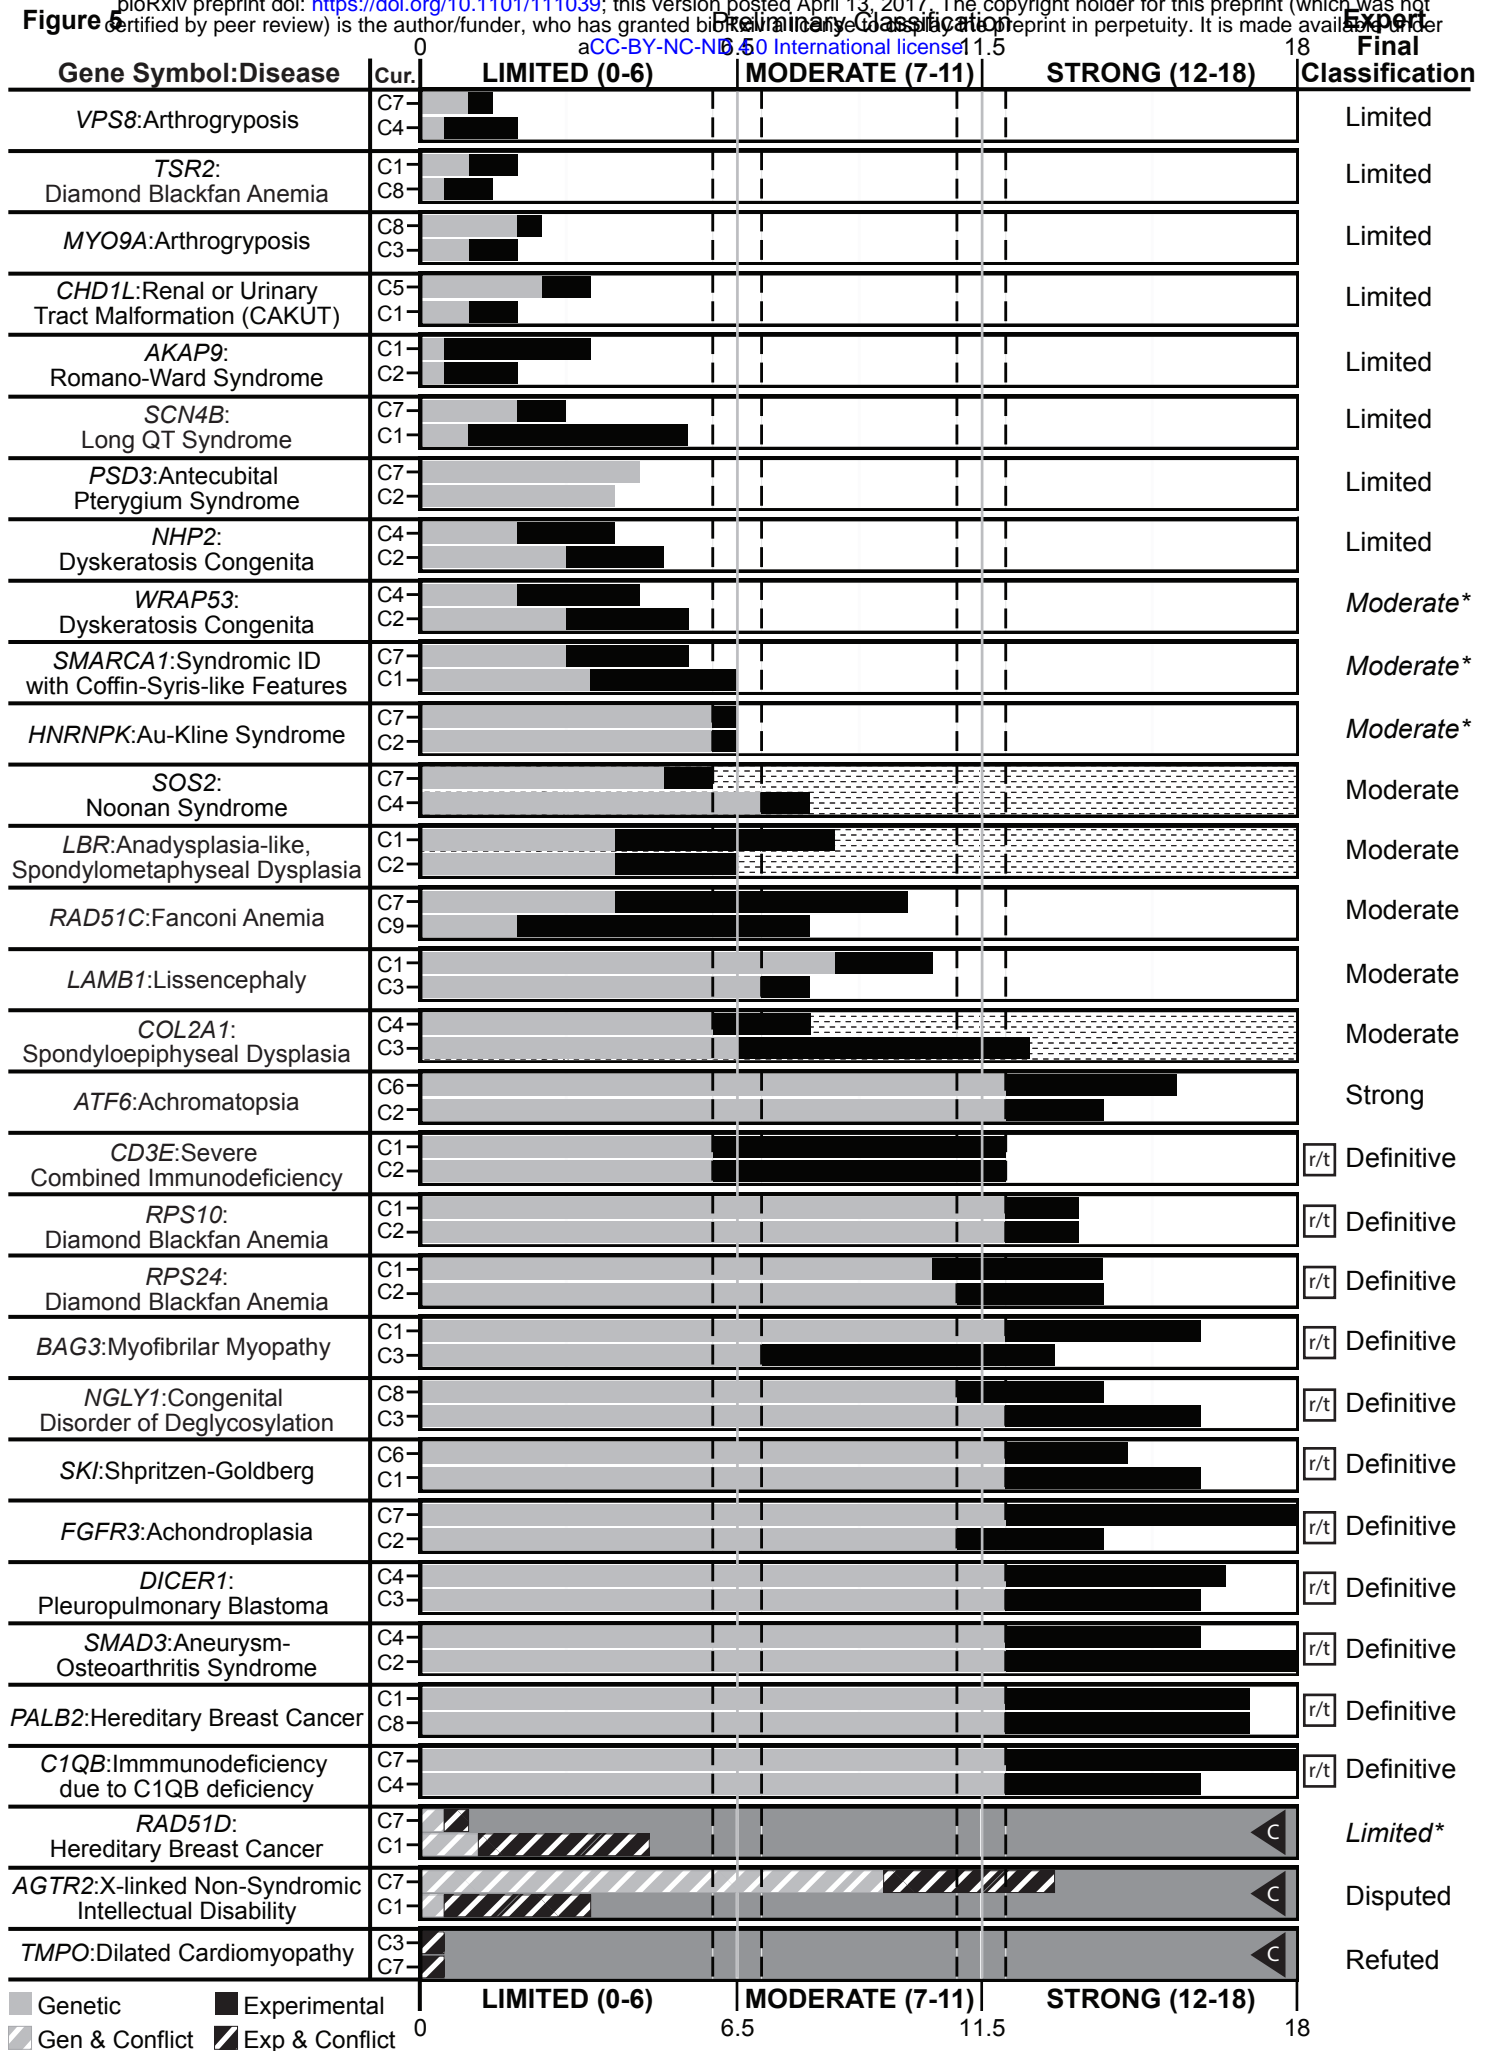

Source: https://www.biorxiv.org/content/biorxiv/early/2017/04/13/111039.full.pdf
